# Supplementary material
Source: publisher figshare collection journal article supplement (https://acs.figshare.com/ndownloader/files/5172265)
Supplement: Supplementary file 1 [file 5172265]

Supporting information for:

## Synthesis and optical resolution of 9,9'-spirobifluorene-1,1'-diol

Xu Cheng, Gou-Hua Hou, Jian-Hua Xie, Qi-Lin Zhou\*

*State Key Laboratory and Institute of Elemento-organic Chemistry,  
Nankai University Tianjin 300071, China*

### General:

All reactions and manipulations were performed using standard Schlenk techniques. THF was distilled from sodium benzophenone ketyl.  $\text{CH}_2\text{Cl}_2$  was distilled from  $\text{CaH}_2$ . Melting points were measured on a RY-I apparatus and uncorrected.  $^1\text{H}$ ,  $^{13}\text{C}$  and  $^{31}\text{P}$  NMR spectra were recorded on a Varian Mercury Vx-300 spectrometer or Bruker 300 MHz. Chemical shifts were reported in ppm down field from internal  $\text{Me}_4\text{Si}$ . Optical rotations were determined using a Perkin Elmer 341 MC polarimeter. Elemental analyses were performed on the Yanaca CDRDER MT-3 instrument. Mass spectra were recorded on the VG-7070E spectrometer. HPLC analyses were performed using a Hewlett Packard Model HP 1100 Series. X-ray diffraction analysis was performed on a Bruker smart-1000 X-ray diffraction meter.

### 1. Synthesis of racemic 9,9'-spirobifluorene-1,1'-diol

#### Preparation of 2-bromo-3'-methoxybiphenyl (1)

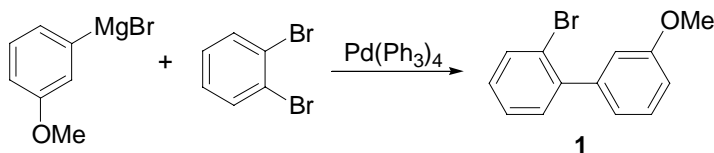

A solution of 3-methoxyphenylmagnesium bromide was prepared from magnesium powders (2.1 g, 89 mmol) and 1-bromo-3-methoxybenzene (16.6 g, 89 mmol) in 100 mL of THF. This solution was added to the mixture of 1,2-dibromobenzene (20.0 g, 92 mmol) and tetrakis(triphenylphosphine)palladium (1.5 g, 1.3 mmol) in 100 mL of THF. The resulted mixture was stirred for 48 h at 40 °C and was hydrolyzed with saturated  $\text{NH}_4\text{Cl}$ . Extraction with  $\text{Et}_2\text{O}$ , dryness over  $\text{MgSO}_4$  and concentration under reduced pressure yielded the crude product. Chromatography of crude product on silica gel with PE/EA (30:1) gave compound **1** as a colorless liquid (14.0 g, 60%).  $^1\text{H}$  NMR (300 MHz,  $\text{CDCl}_3$ )  $\delta$  3.87 (s, 3H, Ar- $\text{OCH}_3$ ), 6.98 (d, 1H,  $J = 7.5$  Hz, Ar-H), 7.13-7.58 (m, 5H, Ar-H), 7.59 (d, 2H,  $J = 7.2$  Hz, Ar-H);  $^{13}\text{C}$  NMR

(75 MHz, CDCl<sub>3</sub>)  $\delta$  55.5, 113.5, 115.3, 122.1, 122.8, 127.6, 129.0, 129.3, 131.4, 133.4, 142.6, 159.4; MS (EI)  $m/z$  263 and 264 ( $M^+$ ); Anal. Calcd for C<sub>13</sub>H<sub>11</sub>BrO: C, 59.34; H, 4.21. Found: C, 59.28; H, 4.18.

### Preparation of bis(3'-methoxybiphenyl-2-yl)methanone (**10**)

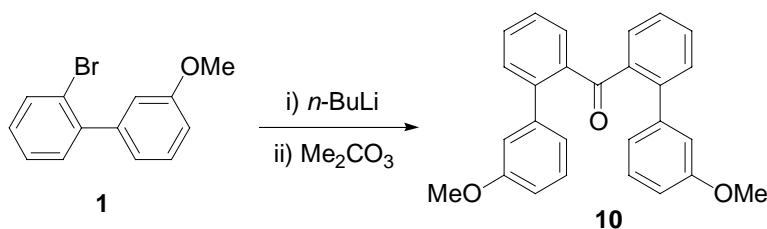

To a solution of **1** (15.1 g, 57.4 mmol) in 120 mL of THF was added *n*-BuLi (34.3 mL, 60 mmol, 1.8 M in Hexane) at -78 °C, and the mixture was stirred for 0.5 h. After slowly addition of methyl carbonate (2.3 g, 25.7 mmol) in 40 mL of THF, this reaction mixture was gradually warmed to -45~ -40 °C and kept at this temperature for 3 h to give a yellow slurry. This slurry was warmed to room temperature, hydrolyzed with saturated NH<sub>4</sub>Cl and evaporated under reduced pressure to remove the solvent. The residue was dissolved in CH<sub>2</sub>Cl<sub>2</sub>, washed with dilute HCl and brine, dried over MgSO<sub>4</sub>, concentrated under reduced pressure to offer a yellow solid. The solid was recrystallized with EA to give compound **10** as a white solid (7.1 g, 75%). M.p. 159~160 °C; <sup>1</sup>H NMR (300 MHz, CDCl<sub>3</sub>)  $\delta$  3.74 (s, 6H, Ar-OCH<sub>3</sub>), 6.64 (s, 2H, Ar-H), 6.69 (t, 4H, *J* = 7.5 Hz, Ar-H), 7.06-7.20 (m, 6H, Ar-H), 7.29-7.39 (m, 4H, Ar-H); <sup>13</sup>C NMR (75 MHz, CDCl<sub>3</sub>)  $\delta$  55.1, 112.7, 114.5, 121.5, 126.7, 128.9, 129.9, 130.4, 130.5, 139.1, 141.2, 141.8, 158.9, 200.5; MS (EI)  $m/z$  394 ( $M^+$ ); Anal. Calcd for C<sub>27</sub>H<sub>22</sub>O<sub>3</sub>: C, 82.21; H, 5.62. Found: C, 82.26; H, 5.71.

### Preparation of bis(2'-bromo-5'-methoxybiphenyl-2-yl)methanone (**11**)

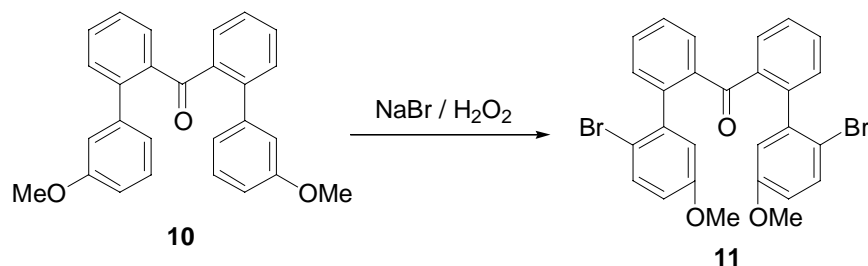

Sodium bromide (5.2 g, 50.8 mmol) and the well-powdered **10** (10.0 g, 25.4 mmol) were added to 300 mL of acetic acid to give a suspension. Hydrogen peroxide (30% aqueous, 15 mL, 0.44 mol) was added to this suspension. After vigorously stirring for 6 h, the mixture was diluted with water and extracted with CH<sub>2</sub>Cl<sub>2</sub> (3×30 mL). The combined organic phase was washed with aqueous NaHCO<sub>3</sub> and brine, dried over MgSO<sub>4</sub> and concentrated under reduced pressure to give a light-yellow solid **11** (14.2 g, 100%). M.p. 158~160 °C; <sup>1</sup>H NMR (300 MHz, CDCl<sub>3</sub>)  $\delta$  3.69 (s, 3H, Ar-OCH<sub>3</sub>), 3.37 (s, 3H, Ar-OCH<sub>3</sub>), 6.63-6.69 (m, 4H, Ar-H), 7.19-7.21

(m, 4H, Ar-H), 7.34-7.50 (m, 5H, Ar-H), 7.59 (d, 1H,  $J = 7.8$  Hz, Ar-H);  $^{13}\text{C}$  NMR (75 MHz,  $\text{CDCl}_3$ )  $\delta$  55.4, 113.7, 113.8, 114.4, 115.3, 116.5, 116.7, 127.2, 127.3, 129.1, 130.0, 130.4, 130.7, 131.0, 131.1, 132.8, 133.0, 137.9, 139.6, 139.7, 140.6, 141.8, 142.4, 158.3, 196.4; MS (EI)  $m/z$  473 ( $\text{M}^+ - \text{Br}$ ); Anal. Calcd for  $\text{C}_{27}\text{H}_{20}\text{Br}_2\text{O}_3$ : C, 58.72; H, 3.65. Found: C, 58.54; H, 3.50.

#### Preparation of 4,4'-dibromo-1,1'-dimethoxy-9,9'-spirobifluorene (**8**)

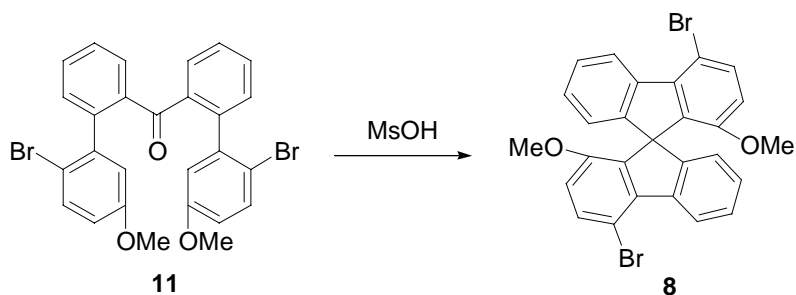

The compound **11** (14.2 g, 25.7 mmol) was added to 400 mL of methanesulfonic acid and was stirred vigorously at 40~50 °C for 5 h. The reaction mixture was poured into ice-cold water, extracted with  $\text{CH}_2\text{Cl}_2$  (3×30 mL). The organic phase was washed with aqueous  $\text{NaHCO}_3$  and brine, dried over  $\text{MgSO}_4$ , concentrated under reduced pressure to offer a yellow solid. This solid was washed with EA to give compound **8** as a white powder (10.0 g, 73%). M.p. 158~160 °C;  $^1\text{H}$  NMR (300 MHz,  $\text{CDCl}_3$ )  $\delta$  3.22 (s, 6H, Ar-OCH<sub>3</sub>), 6.54 (d, 2H,  $J = 8.4$  Hz, Ar-H), 6.63 (d, 2H,  $J = 7.2$  Hz, Ar-H), 7.11 (t, 3H,  $J = 7.5$  Hz, Ar-H), 7.36 (t, 3H,  $J = 7.5$  Hz, Ar-H), 7.47 (d, 2H,  $J = 8.7$  Hz, Ar-H), 8.63 (d, 2H,  $J = 7.5$  Hz, Ar-H);  $^{13}\text{C}$  NMR (75 MHz,  $\text{CDCl}_3$ )  $\delta$  56.0, 103.2, 107.6, 112.4, 119.6, 122.6, 123.1, 126.9, 128.0, 133.6, 137.0, 141.3, 148.0, 155.0; MS (EI)  $m/z$  534 ( $\text{M}^+$ ); Anal. Calcd for  $\text{C}_{27}\text{H}_{18}\text{Br}_2\text{O}_2$ : C, 60.70; H, 3.40. Found: C, 60.72; H, 3.46.

#### Preparation of 1,1'-dimethoxy-9,9'-spirobifluorene (**12**)

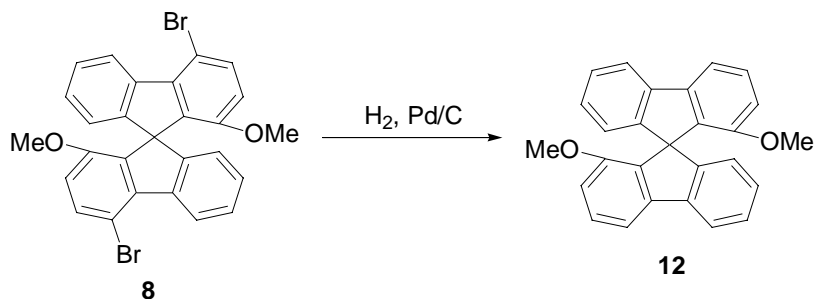

To a solution of the compound **8** (7.2 g, 13.5 mmol) in 120 mL of THF was added tetrabutylammonium bromide (2.9 g, 9 mmol), potassium carbonate (13.1 g, 95 mmol) in 58 mL distilled water and palladium on coal (0.95 g, 10%, 0.9 mmol). The mixture was stirred and hydrogenated by bubbling hydrogen at 35~40 °C for 4 h. After cooling to room

temperature, the reaction mixture was filtrated through celite and extracted with CH<sub>2</sub>Cl<sub>2</sub> (3×30 mL). The organic phase was dried over MgSO<sub>4</sub>, passed through a silica gel pad. Evaporation of solvent under reduced pressure produced compound **12** as a white solid (5.4 g, 100%). M.p. 214~216 °C; <sup>1</sup>H NMR (300 MHz, d<sub>6</sub>-acetone) δ 3.24 (s, 6H, Ar-OCH<sub>3</sub>), 6.52 (d, 2H, *J* = 7.5 Hz, Ar-H), 6.76 (d, 2H, *J* = 8.1 Hz, Ar-H), 7.06 (t, 2H, *J* = 7.5 Hz, Ar-H), 7.29-7.40 (m, 4H, Ar-H), 7.57 (d, 2H, *J* = 7.5 Hz, Ar-H), 7.89 (d, 2H, *J* = 7.8 Hz, Ar-H); <sup>13</sup>C NMR (75 MHz, CDCl<sub>3</sub>) δ 55.8, 111.1, 112.6, 119.8, 122.9, 127.0, 127.4, 129.0, 134.6, 142.0, 144.2, 148.2, 156.1; MS (EI) *m/z* 376 (M<sup>+</sup>); Anal. Calcd for C<sub>27</sub>H<sub>20</sub>O<sub>2</sub>: C, 86.14; H, 5.36. Found: C, 85.96; H, 5.47.

### Preparation of 1,1'-dihydroxy-9,9'-spirobifluorene (**13**)

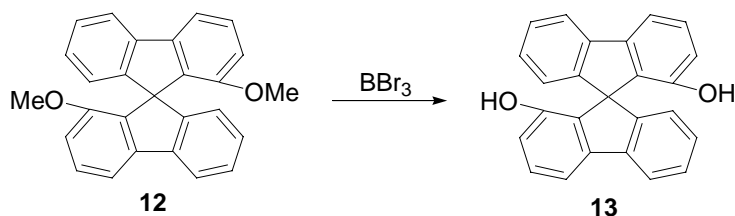

Tribromoboron (7.2 mL, 44 mmol) in 18 mL of CH<sub>2</sub>Cl<sub>2</sub> was added dropwise to a solution of the compound **12** (4.0 g, 11 mmol) in 74 mL of CH<sub>2</sub>Cl<sub>2</sub> at -78 °C. The mixture was stirred overnight and warmed spontaneously during the reaction. The reaction mixture was diluted with CH<sub>2</sub>Cl<sub>2</sub> (50 mL), washed with aqueous NaHSO<sub>3</sub> and brine successively, and dried over MgSO<sub>4</sub>. Concentration under reduced pressure offered a brown solid. Recrystallization of the crude product with acetone and petroleum ether gave the compound **13** as a white solid (3.0 g, 81%). M.p. 289~291 °C; <sup>1</sup>H NMR (300 MHz, CDCl<sub>3</sub>) δ 3.98 (s, 2H, Ar-OH), 6.68 (d, 2H, *J* = 6.6 Hz, Ar-H), 6.78 (d, 2H, *J* = 7.5 Hz, Ar-H), 7.16 (t, 2H, *J* = 7.5 Hz, Ar-H), 7.33-7.43 (m, 4H, Ar-H), 7.50 (d, 2H, *J* = 7.5 Hz, Ar-H), 7.86 (d, 2H, *J* = 8.7 Hz, Ar-H); <sup>13</sup>C NMR (75 MHz, CDCl<sub>3</sub>) δ 31.0, 113.2, 116.1, 120.8, 123.7, 128.5, 128.6, 129.1, 130.6, 141.0, 142.9, 145.5, 152.5; MS (EI) *m/z* 348 (M<sup>+</sup>); Anal. Calcd for C<sub>25</sub>H<sub>16</sub>O<sub>2</sub>: C, 86.19; H, 4.63. Found: C, 85.99; H, 4.66.

## 2. Resolution of racemic 1,1'-dihydroxy-9,9'-spirobifluorene

The well-powdered racemic diol **13** (2.0 g, 5.7 mmol) and (2*R*,3*R*)-N,N,N',N'-tetracyclohexyl- 2,3-dimethoxysuccinamide (**14**) (2.9 g, 5.7 mmol) were added to 16 mL of ethanol, and the mixture was stirred rapidly to give a clear solution. After a few minutes, white precipitate appeared. This slurry was stirred overnight and filtrated to give a white powder. The powder was dissolved in 50 mL of Et<sub>2</sub>O and washed with 1N NaOH. The organic layer was dried over MgSO<sub>4</sub> and concentrated under reduced pressure to recover the resolving reagent. The aqueous layer was acidified by concentrated HCl to pH = 3 and extracted with CH<sub>2</sub>Cl<sub>2</sub> (3×20 mL). The CH<sub>2</sub>Cl<sub>2</sub> phase was dried with MgSO<sub>4</sub> and concentrated under reduced pressure to give the **13** (0.85 g, 85% based on one enantiomer) in 80% ee with *R* configuration.

By repeating the procedures of the inclusion and the decomposition mentioned above, (*R*)-(+)-**13** (0.6 g, 60%) in 99% ee was obtained as a white solid. M.p. 290 °C;  $[\alpha]_D^{25} = +39.2$  (*c* 0.50, CHCl<sub>3</sub>).

The mother liquid of the resolution was concentrated under reduced pressure to give the **13**, with *S* isomer being predominant. The inclusion complex was decomposed by the procedure referred above and subjected to the resolution by (2*S*,3*S*)-**14** to offer the (*S*)-**13** (0.73, 73% based on one isomer) in 99% ee.

The ee values of the resolution products were determined by HPLC analysis on DAICEL OD-H column: Hex/*i*-PrOH = 85:15, flow = 0.7 mL/min, *t<sub>R</sub>* = 17.0 min, *t<sub>S</sub>* = 26.3 min).

### 3. X-ray analysis of inclusion complex

A single crystal of inclusion complex suitable for X-ray analysis was prepared by the recrystallization of the complex in ethanol. M.p. 184~186 °C; <sup>1</sup>H NMR (300 MHz, CDCl<sub>3</sub>) δ 1.06-1.88 (m, 43H, hexyl and methyl in ethanol), 2.34-2.50 (m, 4H, N-CHR<sub>2</sub>), 3.41(s, 6H, OCH<sub>3</sub>), 3.68-3.76 (m, 2H, CH<sub>2</sub> in ethanol), 4.14 (s, 2H, HC-CO), 4.57 (s, 2H, Ar-OH), 6.68 (d, 2H, *J* = 8.1 Hz, Ar-H), 6.78 (d, 2H, *J* = 7.5 Hz, Ar-H), 7.16 (t, 2H, *J* = 7.5 Hz, Ar-H), 7.2-7.48 (m, 4H, Ar-H), 7.49 (d, 2H, *J* = 7.5 Hz, Ar-H), 7.85 (d, 2H, *J* = 7.8 Hz, Ar-H); Anal. Calcd for C<sub>55</sub>H<sub>68</sub>N<sub>2</sub>O<sub>6</sub>: C, 60.70; H, 3.40. Found: C, 60.72; H, 3.36. The structure and the crystal data are in Figure 1 and Table 1. The bond lengths and the bond angles are in cif file.

**Figure 1** X-Ray structure of inclusion complex of (*R*)-**13** and (2*R*,3*R*)-**14**

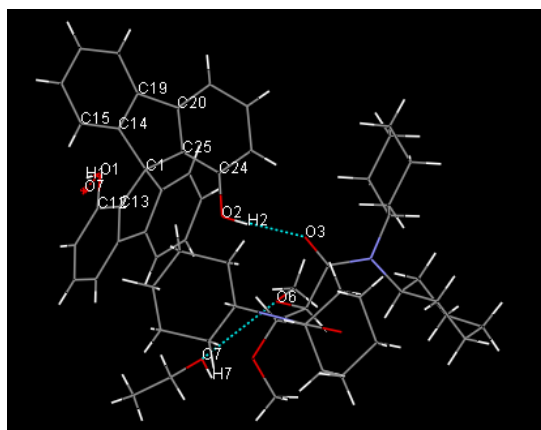

**Table 1.** Crystal data and structure refinement for inclusion complex (*R*)-**13** and (*2R,3R*)-**14**

|                                   |                                                                                               |
|-----------------------------------|-----------------------------------------------------------------------------------------------|
| Empirical formula                 | C <sub>57</sub> H <sub>74</sub> N <sub>2</sub> O <sub>7</sub>                                 |
| Formula weight                    | 899.18                                                                                        |
| Temperature                       | 293(2) K                                                                                      |
| Wavelength                        | 0.71073 Å                                                                                     |
| Crystal system, space group       | Monoclinic, P2(1)                                                                             |
| Unit cell dimensions              | a = 9.718(3) Å    α = 90°<br>b = 25.585(8) Å    β = 113.919(7)°<br>c = 11.268(4) Å    γ = 90° |
| Volume                            | 2561.0(14) Å <sup>3</sup>                                                                     |
| Z, Calculated density             | 2, 1.166 Mg.m <sup>3</sup>                                                                    |
| Absorption coefficient            | 0.076 mm <sup>-1</sup>                                                                        |
| F(000)                            | 972                                                                                           |
| Crystal size                      | 0.22 x 0.20 x 0.18 mm                                                                         |
| Theta range for data collection   | 2.29 to 25.00°                                                                                |
| Limiting indices                  | -11 ≤ h ≤ 11, -30 ≤ k ≤ 30, -13 ≤ l ≤ 7                                                       |
| Reflections collected / unique    | 13219 / 8644 [R(int) = 0.0754]                                                                |
| Completeness to theta = 25.00     | 99.8 %                                                                                        |
| Absorption correction             | Semi-empirical from equivalents                                                               |
| Max. and min. transmission        | 0.9865 and 0.9836                                                                             |
| Refinement method                 | Full-matrix least-squares on F <sup>2</sup>                                                   |
| Data / restraints / parameters    | 8644 / 1 / 601                                                                                |
| Goodness-of-fit on F <sup>2</sup> | 0.951                                                                                         |
| Final R indices [I > 2σ(I)]       | R1 = 0.0687, wR2 = 0.0785                                                                     |
| R indices (all data)              | R1 = 0.2024, wR2 = 0.1083                                                                     |
| Absolute structure parameter      | 2.6(14)                                                                                       |
| Largest diff. peak and hole       | 0.154 and -0.148 e.Å <sup>-3</sup>                                                            |
